# Supplementary material for: Genome-Wide Association Study Identified Novel Genomic Loci Controlling Internode Lengths and Plant Height in Common Wheat under Different Nitrogen Treatments
Source: Research Square preprint supplement (doi:10.21203/rs.3.rs-901017/v1), 2021-10-14
Supplement: Supplementary file 1 [file 0f18cef3ccc591472f406bc6.xlsx]

## Sheet: Sheet1
No. of SNPs across each chromosomes
chromosome	1A	1B	1D	2A	2B	2D	3A	3B	3D	4A	4B	4D	5A	5B	5D	6A	6B	6D	7A	7B	7D
number	489	498	396	368	441	468	600	866	638	519	311	842	613	521	281	363	122	18	83	102	93
Compared same trait under CK and LN environment
	A					B					C					D
environment	2017CK	2017LN	2018CK	2018LN	ave(CK-LN)	2017CK	2017LN	2018CK	2018LN	ave(CK-LN)	2017CK	2017LN	2018CK	2018LN	ave(CK-LN)	2017CK	2017LN	2018CK	2018LN	ave(CK-LN)
PH	101.98	94.15	101.59	93.46	7.98	93.71	85.67	92.23	84.22	8.025	83.45	78.83	81.42	76.29	4.875	89.96	82.82	88.46	81.19	7.205
FIRILT	30.19	29.75	28.41	27.63	0.61	27.3	26.33	26.9	24.63	1.62	24.11	25.1	26.76	24.02	0.875	28.89	27.8	29.31	26.74	1.83
SECILT	22.87	21.92	22.84	22.6	0.595	19.78	18.73	20.39	19.87	0.785	17.71	17.77	17.93	18.53	-0.33	19.16	19	20.12	19.49	0.395
THILT	16.34	14.98	16.26	15.54	1.04	14.42	13.6	13.66	13.39	0.545	12.18	11.9	10.89	11.46	-0.145	13.58	12.53	12.79	12.1	0.87
FORILT	12.92	11.6	12.98	11.28	1.51	11.94	9.92	10.58	10.15	1.225	9.84	9.19	8.09	7.58	0.58	10.03	8.7	9.35	8.21	1.235
FIFILT	8.42	7.07	9.08	7	1.715	8.37	6.1	7.9	6.7	1.735	7.29	5.78	6.26	4.76	1.505	6.71	5.1	6.39	4.73	1.635
SIXILT	3.47	2.7	2.59	1.28	1.04	3.33	3.14	3.17	1.86	0.75	3.35	2.53	2.22	0.84	1.1	2.84	2.59	1.76	1.12	0.445
SL	9.25	8.13	9.31	8.32	1.055	9.62	8.46	9.59	8.48	1.135	9.44	7.99	9.54	8.46	1.265	9.83	8.45	9.94	8.72	1.3
PL	11.65	11.92	8.46	9.49	-0.65	10.01	9.54	7.69	7.01	0.575	7.71	9.77	10.19	8.33	-0.1	10.47	10.67	10.71	9.58	0.465
LRS	0.276464	0.396926	0.316256	0.402044	-0.103125	0.250786	0.399593	0.291043	0.405307	-0.131536	0.31292	0.371663	0.35072	0.378025	-0.0430237	0.292493	0.388922	0.3314	0.393478	-0.0792537
