# Supplementary material for: Genome-Wide Association Study Identified Novel Genomic Loci Controlling Internode Lengths and Plant Height in Common Wheat under Different Nitrogen Treatments
Source: Research Square preprint supplement (doi:10.21203/rs.3.rs-901017/v1), 2021-10-14
Supplement: Supplementary file 2 [file 3894d5a25b3511658a7c4562.xlsx]

## Sheet: h2
Broad sense heritability (h2) of PH related trait
phenotype	FIRILT	SECILT	THILT	FORILT	FIFILT	SIXILT	SL	PL	PH	LRS
h2	0.883873	0.934601	0.93222	0.928541	0.809522	0.66763	0.798838	0.861568	0.970232	0.875

## Sheet: Comparison of traits
Comparison of traits in CK and LN environment
	FIRILT	SECITL	THILT	FORILT	FIFILT	SL	PH	PL	LRS
2014LN-2014CK			*	***	***	***	***		***
2015LN-2015CK	***			***	***	***	***		***
Signif. codes: 0‘***’0.001‘**’0.01‘*’0.05‘.’0.1‘ ’1

## Sheet: ANOVA analysis 
ANOVA--SL
	Df	SumSq	MeanSq	F value	Pr(>F)
ID	119	1391.2	11.69	28.097	<2e-16	***
ENV	2	378.5	189.26	454.851	<2e-16	***
ID:ENV	311	589.9	1.9	4.559	<2e-16	***
Residuals	1331	553.8	0.42
---
Signif. codes: 0‘***’0.001‘**’0.01‘*’0.05‘.’0.1‘ ’1
ANOVA--PL
	Df	SumSq	MeanSq	F value	Pr(>F)
ID	119	20399	171.42	31.927	<	2e-16	***
ENV	2	67	33.53	6.245	0.00201	**
ID:ENV	234	5433	23.22	4.324	<	2e-16	***
Residuals	1045	5611	5.37
---
Signif. codes: 0‘***’0.001‘**’0.01‘*’0.05‘.’0.1‘ ’1
ANOVA--PH
	Df	SumSq	MeanSq	F value	Pr(>F)
ID	119	386365	3247	469.69	<2e-16	***
ENV	2	22365	11183	1617.73	<2e-16	***
ID:ENV	316	21897	69	10.02	<2e-16	***
Residuals	1310	9055	7
---
Signif. codes: 0‘***’0.001‘**’0.01‘*’0.05‘.’0.1‘ ’1
ANOVA--FIRILT
	Df	SumSq	MeanSq	F value	Pr(>F)
ID	119	39150	329	58.46	<2e-16	***
ENV	2	1022	510.8	90.774	<2e-16	***
ID:ENV	316	8813	27.9	4.956	<2e-16	***
Residuals	1310	7372	5.6
---
Signif. codes: 0‘***’0.001‘**’0.01‘*’0.05‘.’0.1‘ ’1
ANOVA--SECILT
	Df	SumSq	MeanSq	F value	Pr(>F)
ID	119	27787	233.5	122.654	<0.0000000000000002	***
ENV	2	34	17.25	9.059	0.000124	***
ID:ENV	316	3390	10.73	5.635	< 0.0000000000000002	***
Residuals	1310	2494	1.9
---
Signif. codes: 0‘***’0.001‘**’0.01‘*’0.05‘.’0.1‘ ’1
ANOVA--THILT
	Df	SumSq	MeanSq	F value	Pr(>F)
ID	119	17580	147.73	95.72	<2e-16	***
ENV	2	125	62.26	40.343	<2e-16	***
ID:ENV	316	2152	6.81	4.413	<2e-16	***
Residuals	1310	2022	1.54
---
Signif. codes: 0‘***’0.001‘**’0.01‘*’0.05‘.’0.1‘ ’1
ANOVA--FORILT
	Df	SumSq	MeanSq	F value	Pr(>F)
ID	119	15129	127.13	79.181	<2e-16	***
ENV	2	496	247.85	154.366	<2e-16	***
ID:ENV	316	1908	6.04	3.761	<2e-16	***
Residuals	1310	2103	1.61
---
Signif. codes: 0‘***’0.001‘**’0.01‘*’0.05‘.’0.1‘ ’1
ANOVA--FIFILT
	Df	SumSq	MeanSq	F value	Pr(>F)
ID	119	7233	60.8	26.527	<2e-16	***
ENV	2	1073	536.7	234.222	<2e-16	***
ID:ENV	316	2808	8.9	3.878	<2e-16	***
Residuals	1300	2979	2.3
---
Signif. codes: 0‘***’0.001‘**’0.01‘*’0.05‘.’0.1‘ ’1
ANOVA--SIXILT
	Df	SumSq	MeanSq	F value	Pr(>F)
ID	115	1590.1	13.83	5.801	<2e-16	***
ENV	2	337.2	168.61	70.742	<2e-16	***
ID:ENV	164	1192.8	7.27	3.051	<2e-16	***
Residuals	819	1952.1	2.38
---
Signif. codes: 0‘***’0.001‘**’0.01‘*’0.05‘.’0.1‘ ’1
ANOVA--LRS
	Df	SumSq	MeanSq	F value	Pr(>F)
ID	111	435.6	3.92	1331.6	<2e-16	***
ENV	2	75.2	37.59	12754.1	<2e-16	***
ID:ENV	327	124.5	0.38	129.1	<2e-16	***
Residuals	884	2.6	0.1
---
Signif. codes: 0‘***’0.001‘**’0.01‘*’0.05‘.’0.1‘ ’1
								1
								1
